# Supplementary material
Source: publisher site journal article supplement (https://www.dovepress.com/article/462688)
Supplement: Supplementary file 1 [file get_supplementary_file.php]

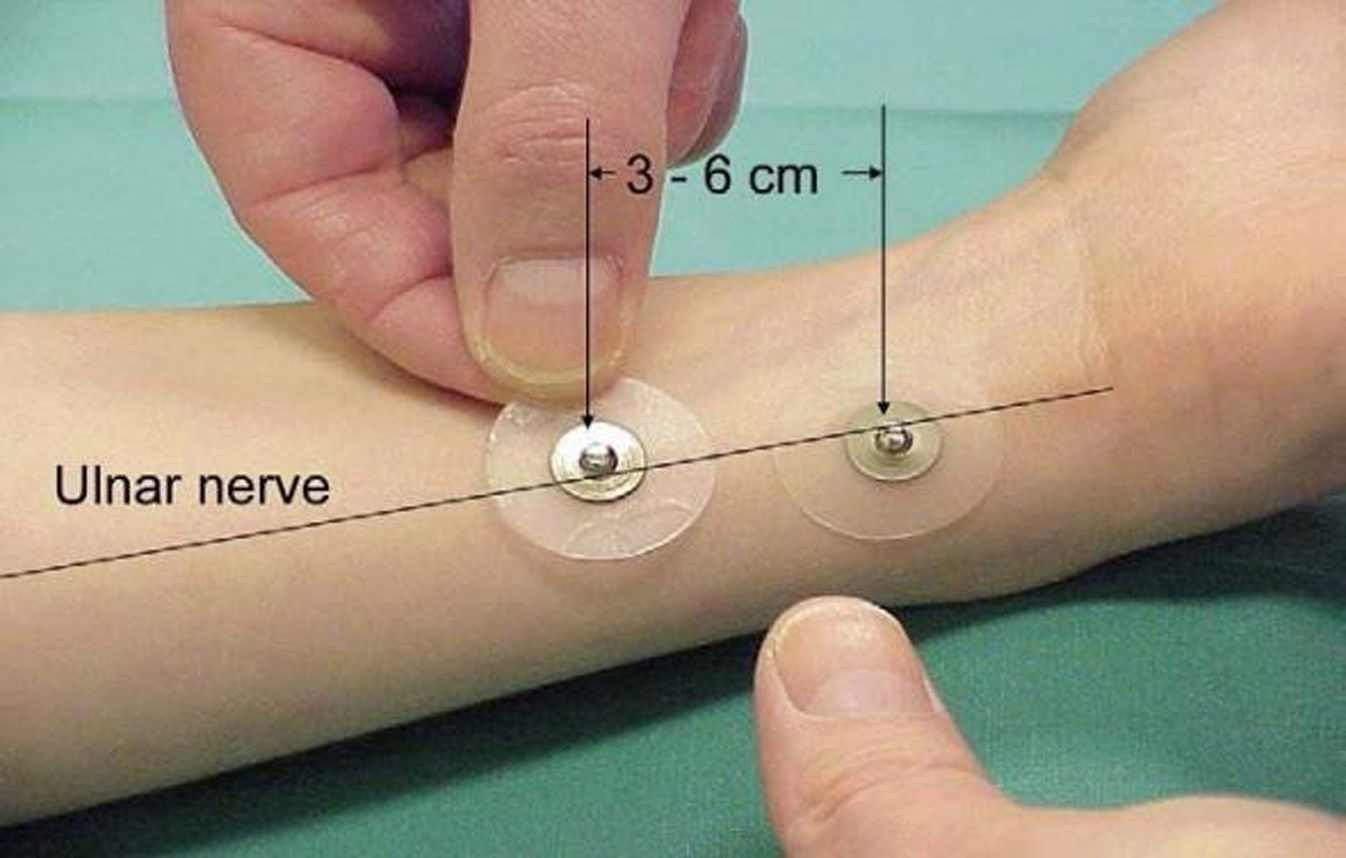


Supplemental Fig. 1. Muscle relaxation monitor electrode placement on the ulnar nerve


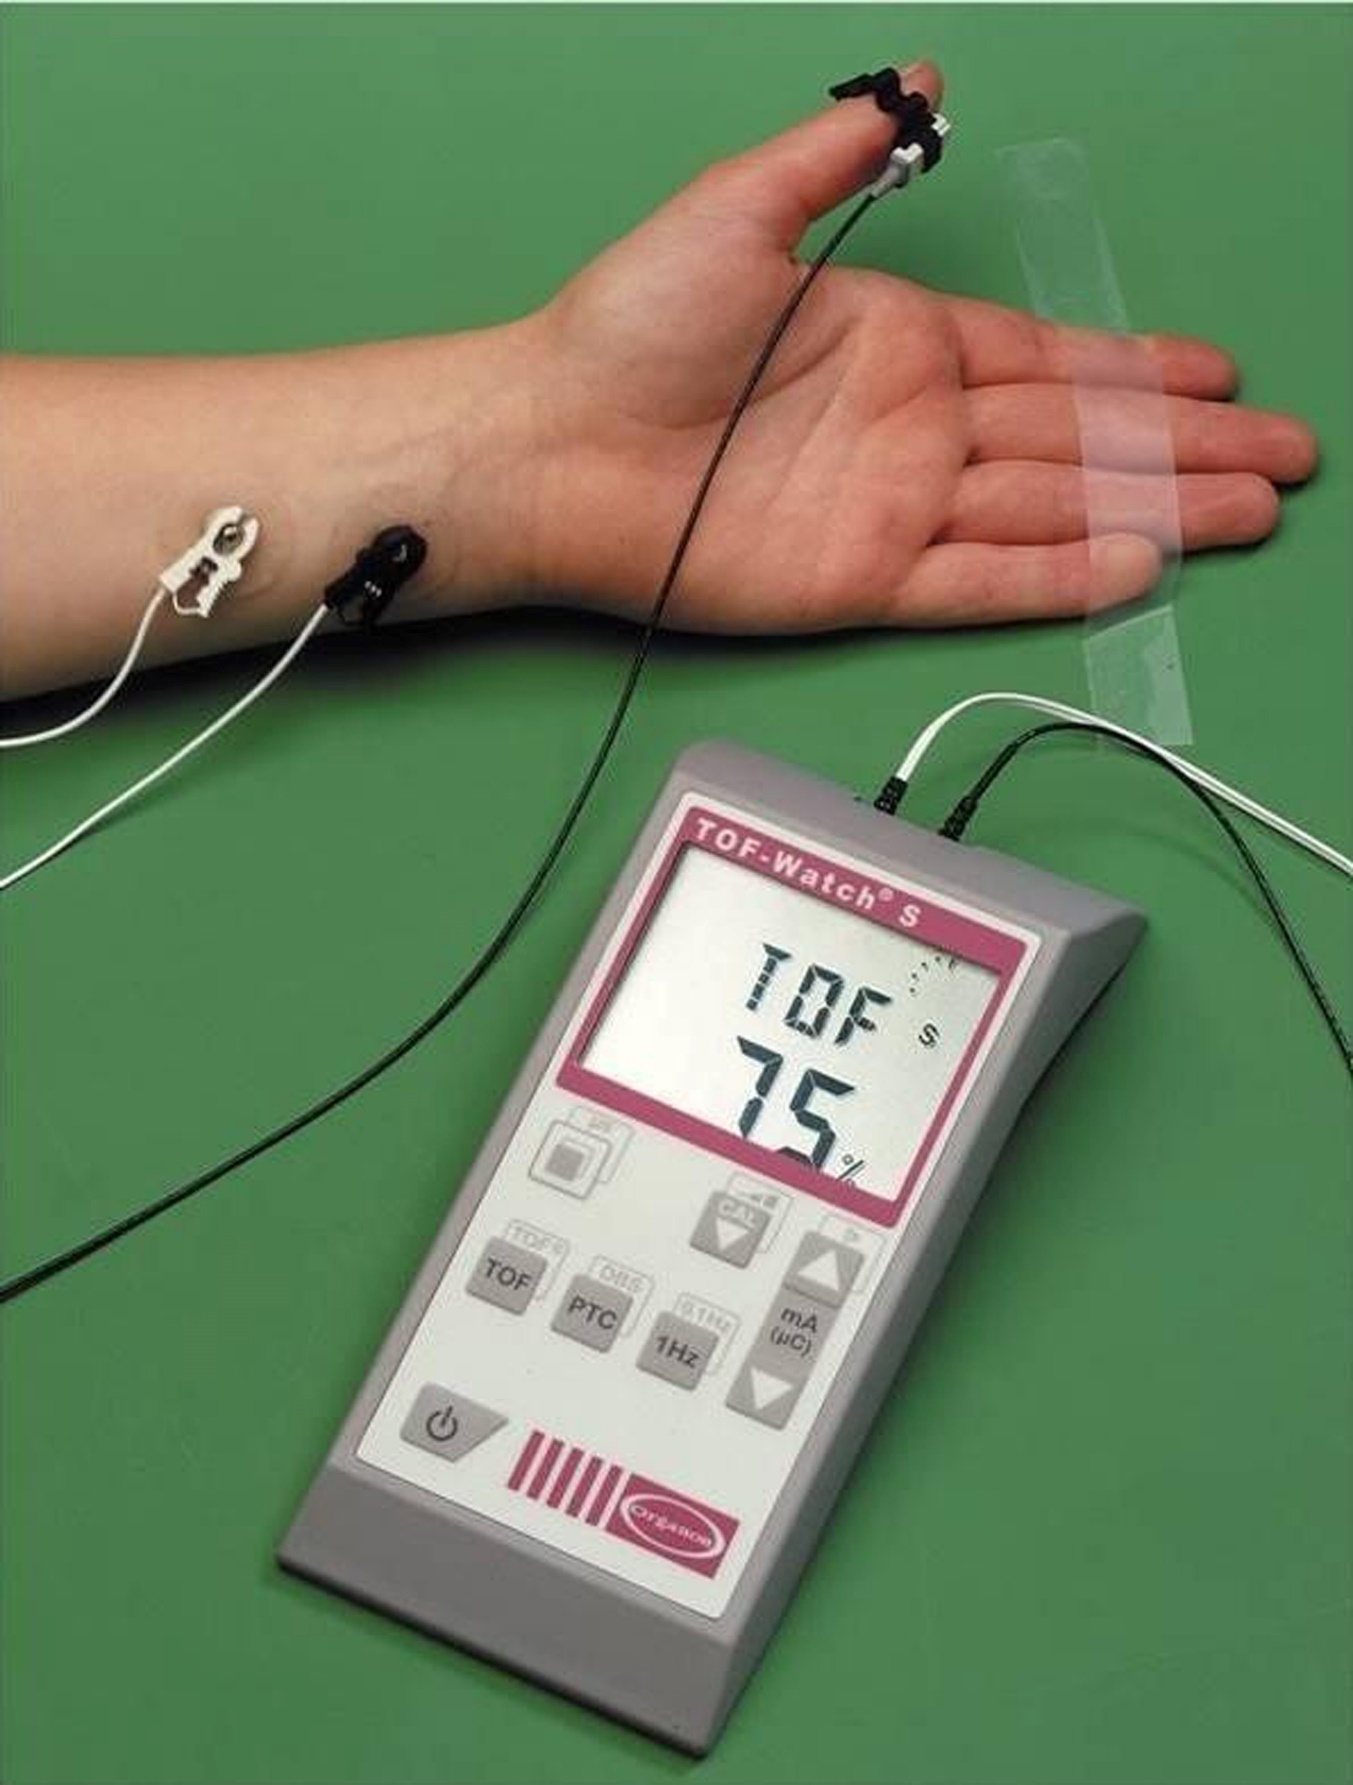


Supplemental Fig. 2. TOF values measured by the muscle relaxation monitor and the transducer position.
